# Supplementary material for: Efficient bioremediation of radioactive iodine using biogenic gold nanomaterial-containing radiation-resistant bacterium, Deinococcus radiodurans R1
Source: Royal Society of Chemistry journal article supplement (doi:10.1039/c7cc00720e), 2017-01-01
Supplement: c7cc00720e1.pdf [file c7cc00720e1.pdf]

## Supporting information

# Efficient bioremediation of radioactive iodine Q1 Q2 using biogenic gold nanomaterial-containing radiation-resistant bacterium, *Deinococcus radiodurans* R1†

Mi Hee Choi,<sup>[a],§</sup> Sun-Wook Jeong,<sup>[b],§</sup> Ha Eun Shim,<sup>[a,c]</sup> Seong-Jae Yun,<sup>[a]</sup> Sajid Mushtaq,<sup>[a,d]</sup>  
Dae Seong Choi,<sup>[a]</sup> Beom-Su Jang,<sup>[a,d]</sup> Jung Eun Yang,<sup>[e]</sup> Yong Jun Choi,<sup>\*[b]</sup> and Jongho  
Jeon<sup>\*[a,d]</sup>

<sup>a</sup>Advanced Radiation Technology Institute, Korea Atomic Energy Research Institute,  
Jeongeup, Republic of Korea

<sup>b</sup>School of Environmental Engineering, University of Seoul, Seoul, Republic of Korea

<sup>c</sup>Department of Chemistry, Kyungpook National University, Daegu, Republic of Korea

<sup>d</sup>Department of Radiation Biotechnology and Applied Radioisotope Science, University of  
Science and Technology, Daejeon, Republic of Korea

<sup>e</sup>Department of Chemical and Biomolecular Engineering, Korea Advanced Institute of  
Science and Technology, Republic of Korea

§These authors contributed equally to this work.

\*Corresponding authors: jeonj@kaeri.re.kr; yongjun2165@uos.ac.kr

## Experimental section

### 1. Removal of radioactive iodines using gold nanoparticles

Citrate stabilized gold nanoparticles (AuNPs) with different sizes (13 nm, 30 nm, 50 nm, and 80 nm) were added to  $[^{125}\text{I}]\text{NaI}$  solution. The molar ratio of  $[^{125}\text{I}]\text{NaI}$  to AuNPs was 100. After 15 min incubation at room temperature, the efficiency of each desalination experiment was determined by using radio-TLC analysis (see the equation (i) and figure S7).

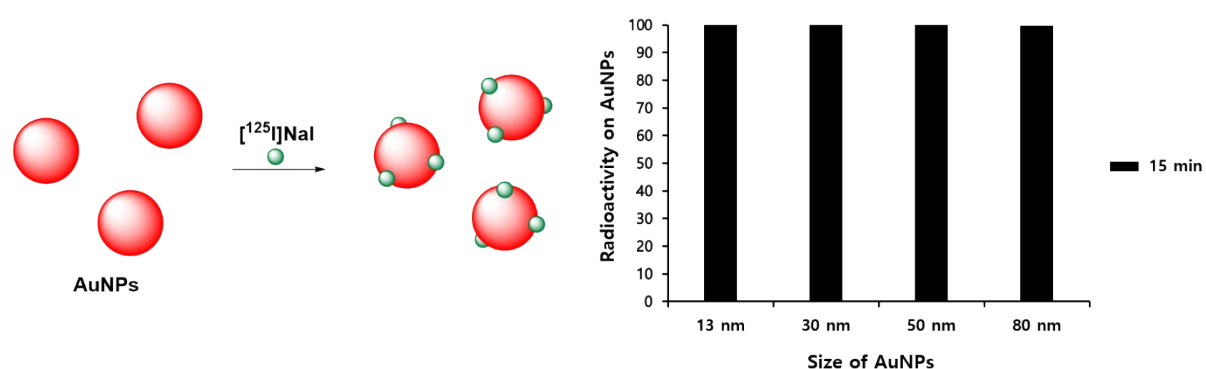

**Figure S1.** Adsorption of  $[^{125}\text{I}]\text{NaI}$  on various size of AuNPs.

To determine the sustainability of the removal system, 10  $\mu\text{L}$  of NaCl (1.5 M) or DTT solution (1.5 M) was added to 90  $\mu\text{L}$  of  $^{125}\text{I}$ -captured 13 nm gold nanoparticles at room temperature. The amount of released radioactivity from gold nanoparticles was then analysed by radio-TLC for 6 h (see the equation (i) and figure S7).

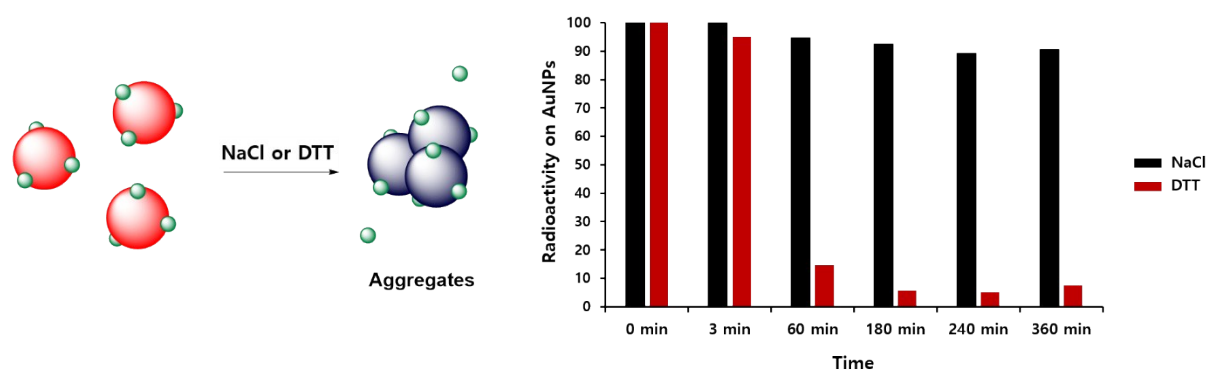

**Figure S2.** Desorption of  $[^{125}\text{I}]\text{NaI}$  from AuNPs by adding NaCl or DTT

## 2. Bacterial cultivation

*Deinococcus radiodurans* R1 (ATCC 13939, DR), a radiation-resistant bacterium used in this study, was grown in TGY medium containing 0.5% tryptone, 0.1% glucose, and 0.3% yeast extract. *D. radiodurans* R1 cells were inoculated in 3 mL TGY broth and incubated at 30 °C with agitation (200 rpm) for 24 h. 500 µL of pre-cultured cells were transferred to 50 mL fresh TGY broth and incubated until OD value at 1.0.

## 3. *In vivo* synthesis of gold nanomaterials by *D. radiodurans* R1

Chloroauric acid trihydrate ( $\text{HAuCl}_4 \cdot 3\text{H}_2\text{O}$ ) was purchased from Sigma-Aldrich Korea.  $\text{HAuCl}_4 \cdot 3\text{H}_2\text{O}$  stock solution (125 mM, 0.5 mL) was added to TGY broth with or without the DR cells (OD 1.0, 50 mL) as the final concentration of 1.25 mM and incubated for 16 h at 30 °C with agitation (200 rpm). The color of cell broth was changed from orange-pink to dark blue (Figure S3). After cultivation with gold salts for 16 h, cells were harvested by centrifugation at 4,000 rpm for 30 min at 4 °C and washed three times with deionized water. UV absorption spectrum of *D. radiodurans* R1 and gold nanomaterials-embedded *D. radiodurans* R1 (Au-DR) were measured by using UV-vis spectrophotometer (SpectraMax M3, Molecular Devices). The absorbance of cell solutions was measured from 450 nm to 700 nm on UV/vis spectrophotometer. UV spectrum of Au-DR showed a broad absorption (500-600 nm) and the maximum wavelength of Au-DR was observed at 551 nm (Figure S4).

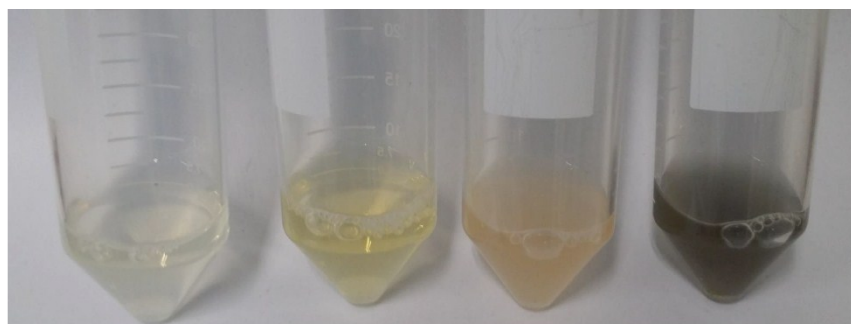

|                          |   |   |   |   |
|--------------------------|---|---|---|---|
| TGY                      | + | + | + | + |
| Au                       | - | + | - | + |
| <i>D. radiodurans</i> R1 | - | - | + | + |

**Figure S3.** Biosynthesis of AuNP by DR in TGY liquid media.

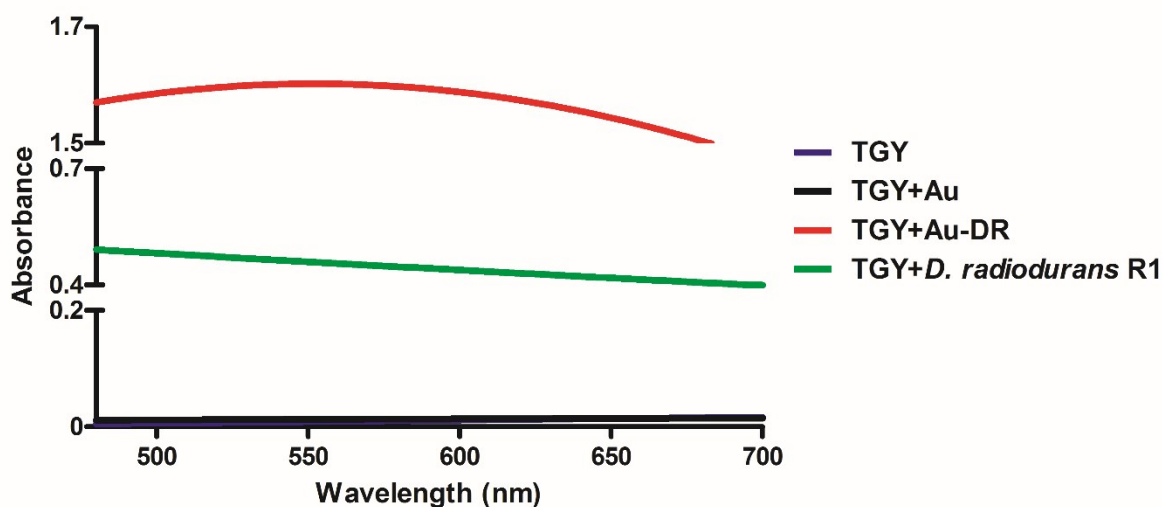

**Figure S4.** UV-vis spectrum of Au-DR and *D. radiodurans* R1.

### 3. Characterization of biogenic gold nanomaterials.

**Field emission scanning electron microscopy (FE-SEM) analysis.** Au-DR cells were harvested and washed three times with deionized water. The cell suspensions were disrupted by bead-beating using FastPrep®-24 Instrument (MP Biomedicals, Korea) at 6 m/s for 1 min and filtered using 0.22  $\mu\text{m}$  syringe filters to purify gold nanomaterials from disrupted samples. Purified samples were dropped on carbon tape and air-dried for 10 min. Then the samples were coated with platinum using ion sputter. The morphology of gold nanomaterials was observed using FEI Verios 460L field emission scanning electron microscope (FEI, Oregon, USA) under the high performance conditions with accelerating voltages up to 15 kV. Elemental composition of gold nanomaterial was analyzed by SEM-energy dispersive X-ray (EDX) (AMITEC) analysis with accelerating voltages up to 20 kV. EDX spectrum was recorded in the area scan mode by focusing the electron beam onto a region of the sample surface (Figure S5).

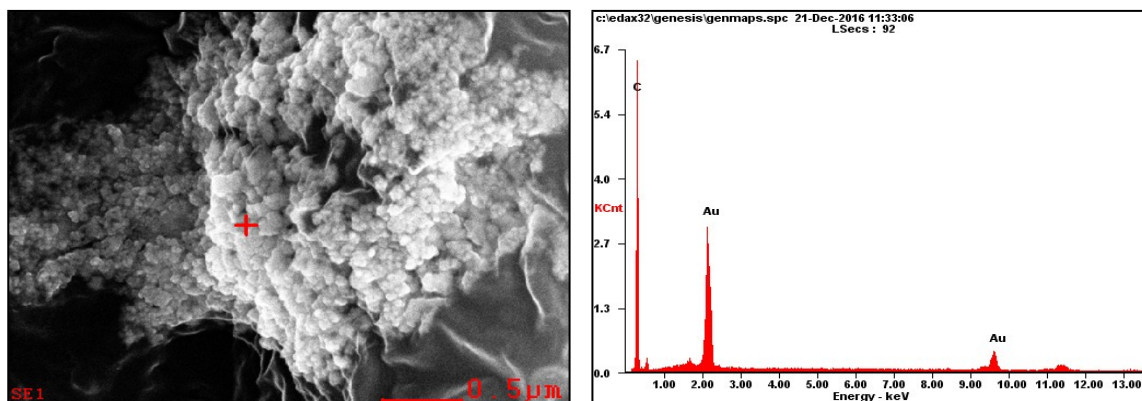

**Figure S5.** EDX analysis of biogenic gold nanomaterials by *D. radiodurans* R1.

**DLS analysis.** Au-DR cells were disrupted and centrifuged to separate cell debris and biogenic gold nanomaterial. The supernatants were taken and 10-fold diluted in nuclease-free water. Size distribution of biogenic gold nanomaterial was determined by a Malvern Zetasizer Nano-ZS90 and the result was analyzed by Zetasizer software (Malvern Instruments). All measurements were carried out at 25 °C and three measurements with at least 10 sub-runs were performed for each sample.

**TEM analysis.** For TEM imaging study, Au-DR cells were placed on carbon-coated copper grids (Gilder Grids) and all samples were observed with accelerating voltages up to 120 kV (Hitachi, H-7650).

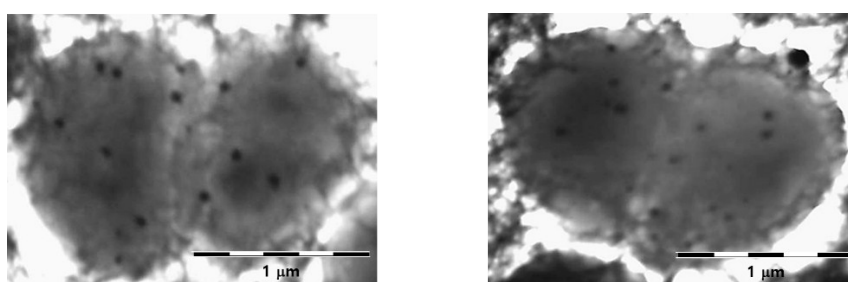

**Figure S6.** TEM images of Au-DR

**Dark-field microscopy analysis.** Dark-field imaging of Au-DR was carried out by using Olympus BX-43 (Olympus Corporation, Tokyo, Japan) microscope, equipped with an oil (or water) immersion dark-field condenser and CCD camera. A objective lens (60×) was used for cell imaging.

#### 4. Remediation procedure of radioactive iodine ( $^{125}\text{I}[\text{NaI}]$ ) using Au-DR.

$^{125}\text{I}[\text{NaI}]$  solution (5  $\mu\text{L}$ , 3.7 MBq) (New Korea Industrial Co. Ltd) was added to Au-DR suspended in aqueous media (water, PBS, and synthetic urine). The mixture was shaken on an orbital shaker for 60 min. At each time points (15 sec, 1 min, 5 min, 15 min, 30 min, and 60 min), an aliquot (0.2  $\mu\text{L}$ ) was withdrawn from Au-DR solution and it was applied onto a silica-coated thin layer chromatography (TLC) plate. The TLC plate was then developed using acetone as a mobile phase. After the solvent traveled to the top of the plate, the TLC plate was placed on a radio-TLC scanner (Biosacn, AR-2000) and the removal efficiency was monitored by using the scanner and a radioactivity dose calibrator (Capintec, Inc). The captured radioactivity by the Au-DR (or gold nanomaterials) was detected at the bottom position. But free  $^{125}\text{I}[\text{NaI}]$  was eluted to higher position ( $R_f = 0.8$ ) on TLC (Figure S7).

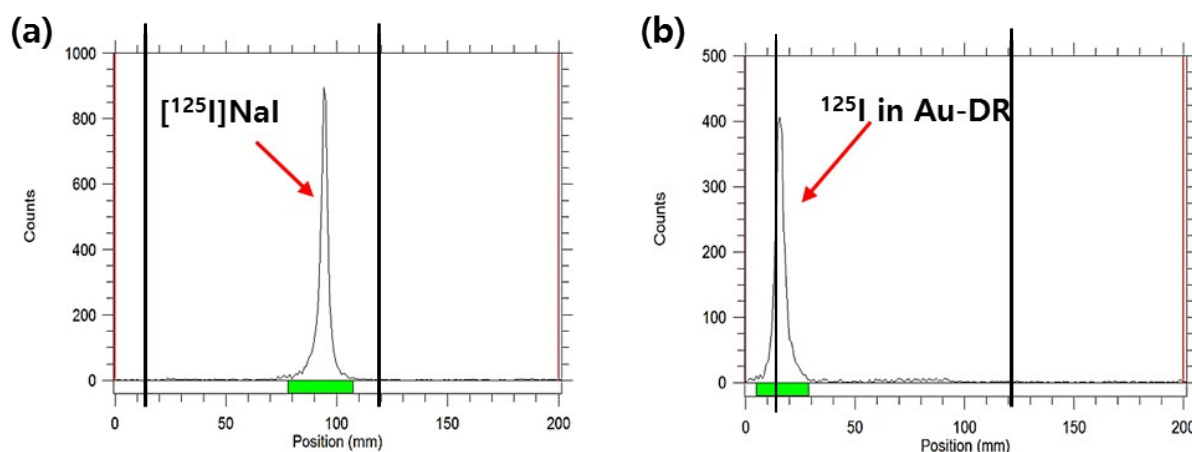

**Figure S7.** Radio-TLC results (a) free iodine ( $^{125}\text{I}[\text{NaI}]$ ) in solution and (b)  $^{125}\text{I}$  captured by Au-DR (30 min after the remediation procedure)

The removal efficiency (%) was defined by the following equation to assess the removal capability of Au-DR towards radioactive iodine:

$$\text{Removal efficiency (\%)} = A_1 / (A_1 + A_2) \times 100 \quad (\text{i})$$

where  $A_1$  and  $A_2$  represent the amount of radioactivity at the  $R_f$  value of 0 and 0.8 on radio-TLC respectively.

In the remediation experiment (Figure 3a, 1 x PBS), distribution coefficient ( $K_d$ ) was determined by the following equation:

$$K_d = (C_0 - C_e)/C_e \times \frac{V}{M} \quad (\text{ii})$$

where  $C_0$  and  $C_e$  represent the initial concentration of  $^{125}\text{I}$  and the equilibrium concentration in aqueous solution respectively.  $V$  denotes the volume of  $^{125}\text{I}$  solution (5 mL) and  $M$  is the mass of gold nanomaterial in the cell. Assume that all chloroauric acid was converted to nanomaterial, the mass of gold nanomaterial in *D. radiodurans* can be calculated as follows.

Mass of gold nanomaterial in *D. radiodurans* = 125 mM x 0.5 mL x 196.97 (g/mol) = 12.3 mg

As the removal efficiency was observed to be 99.9%,  $K_d$  value of the remediation experiment (Figure 3a, 1 x PBS) was determined to be  $4.06 \times 10^5$  mL/g.

To evaluate the reusability of Au-DR, the same bioremediation procedure described above (3.7 MBq of [ $^{125}\text{I}$ ]NaI) was repeated for seven times at 1 h intervals. Removal efficiency was determined by using radio-TLC analysis (Figure S8).

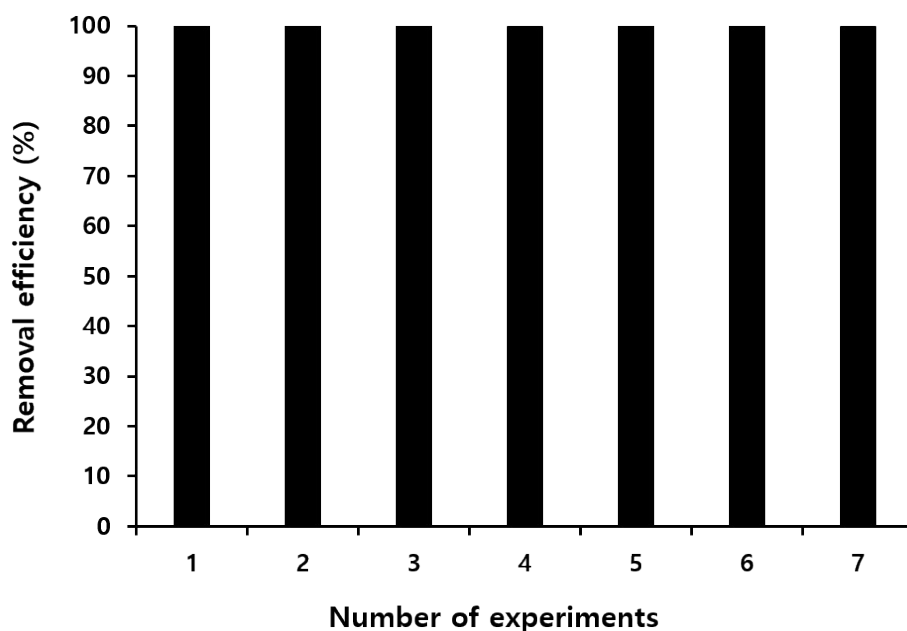

**Figure S8.** Reusability test of Au-DR

To investigate desorption rate of radioactivity from the cell, three  $^{125}\text{I}$  (3.7 MBq) captured Au-DR suspended in pure water, 1 x PBS, and synthetic urine (1 mL for each cell) were prepared. Residual radioactivity in aqueous solutions were monitored using radio-TLC analysis for 24 h (Figure S9). Amount of radioactivity retained in the cell was calculated by the equation (i).

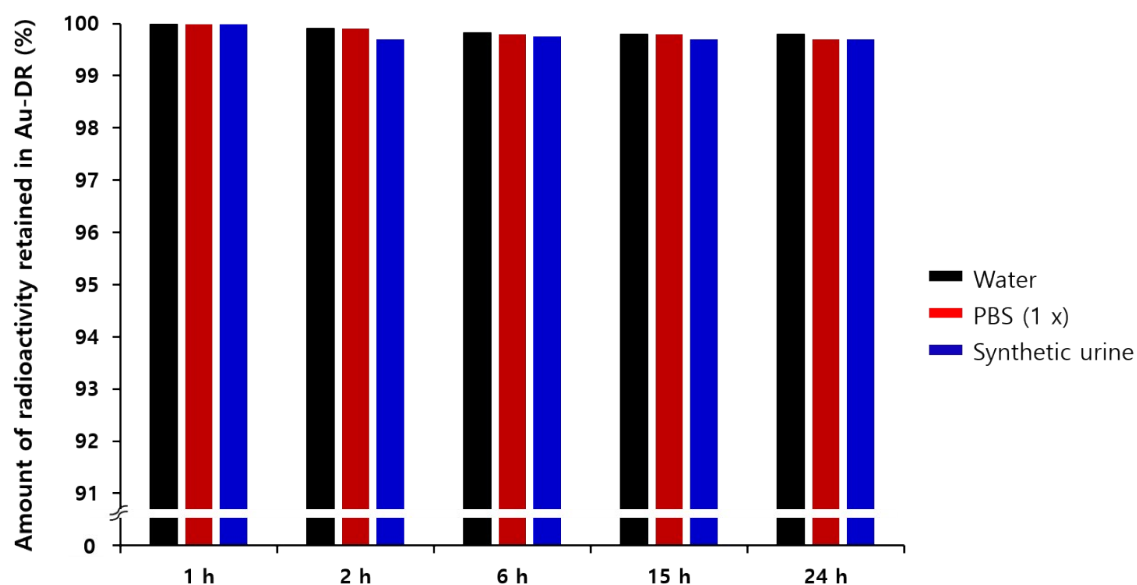

**Figure S9.** Desorption of radioactive iodine from Au-DR

**5. SPECT/CT Imaging of AuNP in *D. radiodurans*.** To both Au-DR and *D. radiodurans* R1 cells suspended in 5 mL of pure water, 5  $\mu\text{L}$  of  $^{125}\text{I}$ NaI (3.7 MBq) was added and then the resulting mixture was shaken on a rotary shaker for 30 min. Next, a part of each cells was transferred to 1.5 mL tube and it was subjected to centrifugation for spinning down of the cells (5000 rpm for 5 min). SPECT/CT images of each tube were obtained by using Inveon SPECT/CT system (Siemens, USA).

**6. Cell viability exposed to gamma radiation.** *D. radiodurans* and Au-DR were taken at 16 h and washed three times before cell viability assay. *D. radiodurans* and Au-DR were exposed to different doses of gamma radiation (2, 4, 6, and 8 kGy) using the cobalt-60 gamma irradiator (point source; AECL, IR-79). After radiation, serially diluted *D. radiodurans* were spotted onto TGY agar plate) and incubated at 30 °C for 3 days. Survived cells were normalized by control cells (0 kGy).



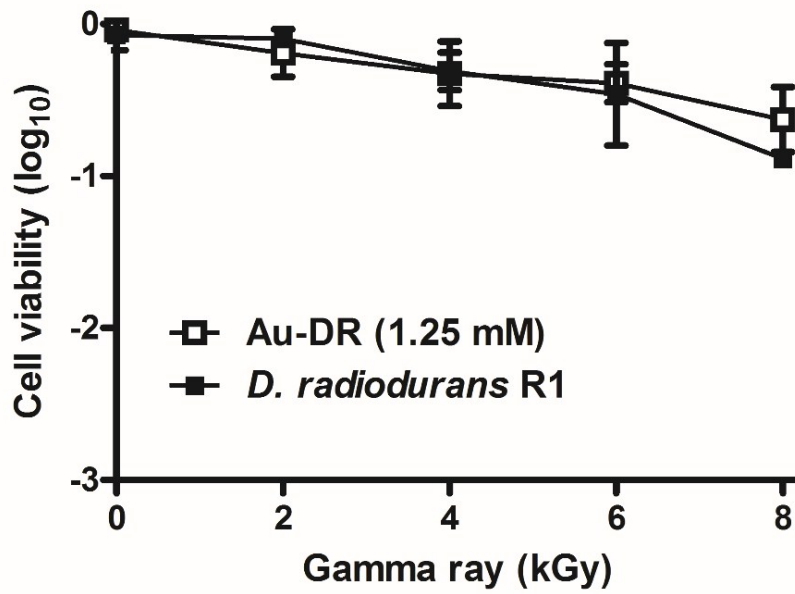

**Figure S10.** The measurement of the cell viability of *D. radiodurans* (a) and Au-DR (b) exposed to gamma radiation.

**Table S1.** Comparison to known desalination methods

| <b>Adsorbent</b>                    | <b>Contact time (h)</b> | <b>Removal efficiency (%)</b> | <b>Reference in manuscript</b> |
|-------------------------------------|-------------------------|-------------------------------|--------------------------------|
| Cu(I) sulfide minerals              | >24                     | >70                           | 16                             |
| Cupric metal complex                | >100                    | High                          | 15                             |
| Zeolites                            | 2 (at 550 °C)           | >99                           | 21                             |
| Activated carbons                   | 0.5                     | 70                            | 19                             |
| Metal-organic frameworks            | 48                      | >95                           | 24                             |
| Metal-organic frameworks            | >24                     | >90                           | 22                             |
| Deep eutectic solvent               | 5                       | >99                           | 23                             |
| Microporous polymers                | 48                      | 56                            | 25                             |
| Silver oxide titanate nanomaterials | <0.5                    | >99                           | 17                             |
